# Supplementary material for: GLAMbox: A Python toolbox for investigating the association between gaze allocation and decision behaviour
Source: PubMed Central journal article supplement (PMC6914332; doi:10.1371/journal.pone.0226428), 2019-12-16
Supplement: pone.0226428.s005.pdf [file pone.0226428.s005.pdf]

| Dataset       | N  | Parameter | Mean  | SD   | min   | 25%   | 50%   | 75%  | max  |
|---------------|----|-----------|-------|------|-------|-------|-------|------|------|
| Folke 2016    | 24 | $v$       | 0.25  | 0.08 | 0.17  | 0.19  | 0.22  | 0.3  | 0.51 |
|               |    | $\gamma$  | -0.01 | 0.28 | -0.45 | -0.22 | -0.04 | 0.2  | 0.43 |
|               |    | $\sigma$  | 0.19  | 0.03 | 0.12  | 0.17  | 0.19  | 0.21 | 0.28 |
|               |    | $\tau$    | 1.85  | 0.97 | 0.43  | 1.19  | 1.62  | 2.52 | 3.92 |
| Krajbich 2010 | 39 | $v$       | 0.77  | 0.33 | 0.24  | 0.53  | 0.77  | 0.93 | 1.69 |
|               |    | $\gamma$  | 0.23  | 0.47 | -0.78 | -0.07 | 0.33  | 0.6  | 0.85 |
|               |    | $\sigma$  | 0.28  | 0.05 | 0.19  | 0.25  | 0.29  | 0.32 | 0.38 |
|               |    | $\tau$    | 0.74  | 0.52 | 0.1   | 0.37  | 0.57  | 1.09 | 2.27 |
| Krajbich 2011 | 30 | $v$       | 0.67  | 0.33 | 0.18  | 0.44  | 0.63  | 0.78 | 1.58 |
|               |    | $\gamma$  | 0.19  | 0.41 | -1.02 | -0.07 | 0.33  | 0.45 | 0.81 |
|               |    | $\sigma$  | 0.25  | 0.05 | 0.17  | 0.22  | 0.25  | 0.28 | 0.36 |
|               |    | $\tau$    | 1.0   | 0.71 | 0.24  | 0.52  | 0.81  | 1.39 | 3.53 |
| Tavares 2017  | 25 | $v$       | 0.84  | 0.3  | 0.38  | 0.54  | 0.9   | 1.02 | 1.4  |
|               |    | $\gamma$  | 0.09  | 0.23 | -0.36 | 0.01  | 0.08  | 0.22 | 0.54 |
|               |    | $\sigma$  | 0.37  | 0.05 | 0.23  | 0.35  | 0.37  | 0.39 | 0.46 |
|               |    | $\tau$    | 0.54  | 0.26 | 0.12  | 0.34  | 0.49  | 0.74 | 0.97 |

**S1 Table.**
